# Supplementary material
Source: PubMed Central journal article supplement (PMC3911018)
Supplement: AEM.02223-13_zam999104977so1.pdf [file AEM.02223-13_zam999104977so1.pdf]

## SUPPLEMENTAL MATERIAL

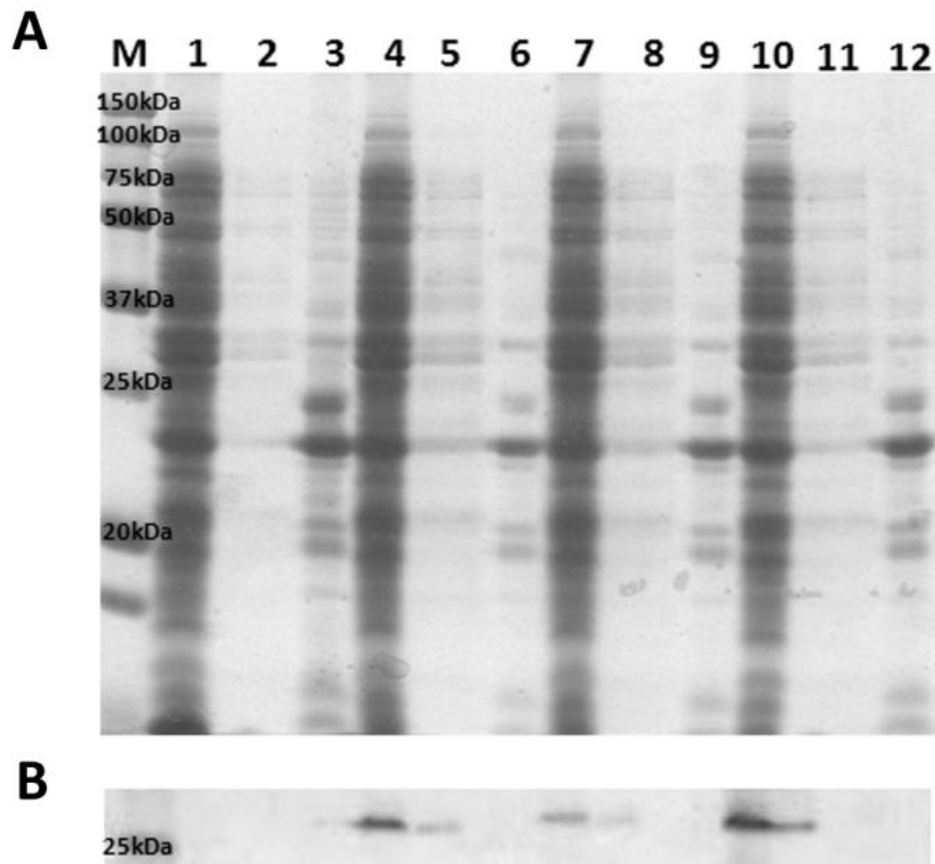

**Figure S1. SDS-PAGE Analysis and Immunoblotting Analysis** (A) SDS-PAGE analysis and (B) Western blot analysis of recombinant *E. coli* XL10-Gold cells expressing OmpW-PerPA fusion proteins. Lane M, molecular mass standards; lane 1, whole-cell lysate of XL10-Gold harboring pOW13F-PerPA1; lane 2, soluble fraction of XL10-Gold harboring pOW13F-PerPA1; lane 3, outer membrane fraction of XL10-Gold harboring pOW13F-PerPA1; lane 4, whole-cell lysate of XL10-Gold harboring pOW13F-PerPA2; lane 5, soluble fraction of XL10-Gold harboring pOW13F-PerPA2; lane 6, outer membrane fraction of XL10-Gold harboring pOW13F-PerPA2; lane 7, whole-cell lysate of XL10-Gold harboring pOW13F-PerPA3; lane 8, soluble fraction of XL10-Gold harboring pOW13F-PerPA3; lane 9, outer membrane fraction of XL10-Gold harboring pOW13F-PerPA3; lane 10, whole-cell lysate of XL10-Gold harboring pOW13F-PerPA4; lane 11, soluble fraction of XL10-Gold harboring pOW13F-PerPA4; lane 12, outer membrane fraction of XL10-Gold harboring pOW13F-PerPA4.

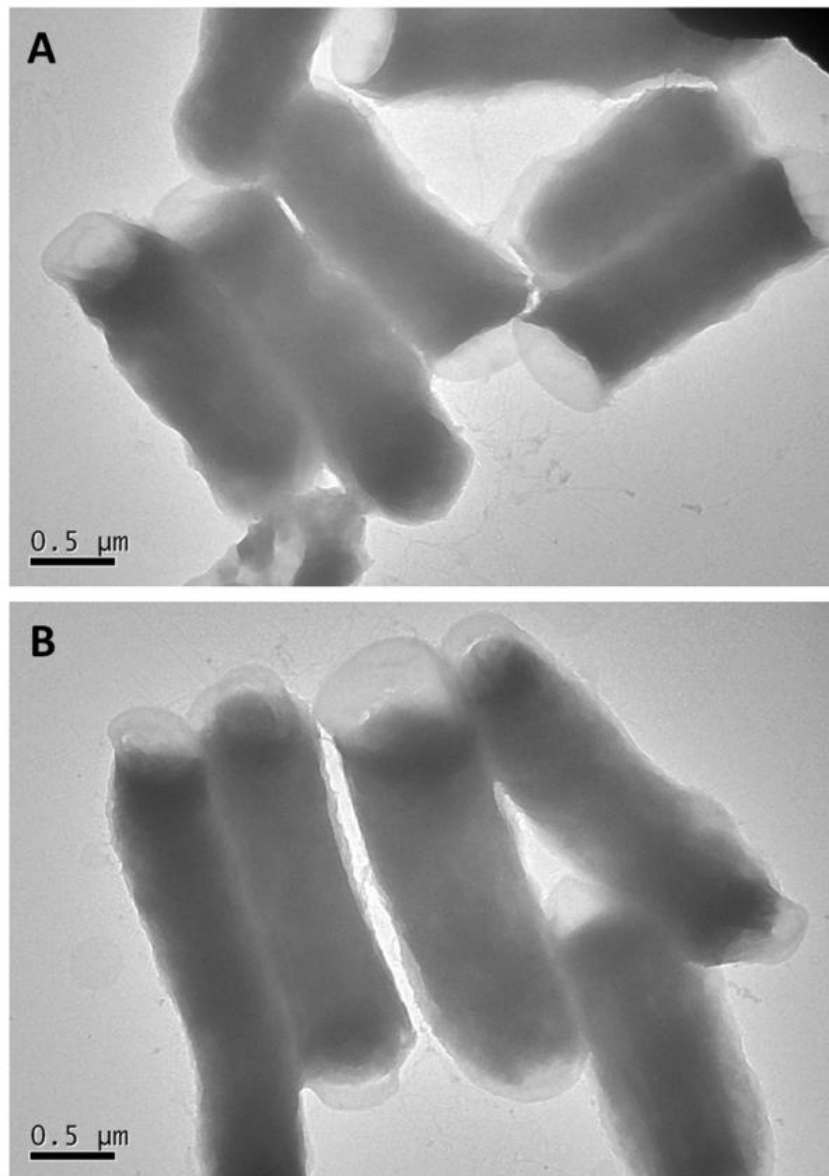

**Figure S2.** TEM analysis of XL10-Gold cell harboring (A) pOW19F-PerpA3 and (B) pOW19F-PerPA4 after incubation in gold solution ( $\text{HAuCl}_4$ ) without tyrosinase. No gold nanoparticle formation was observed in both recombinant *E. coli*.

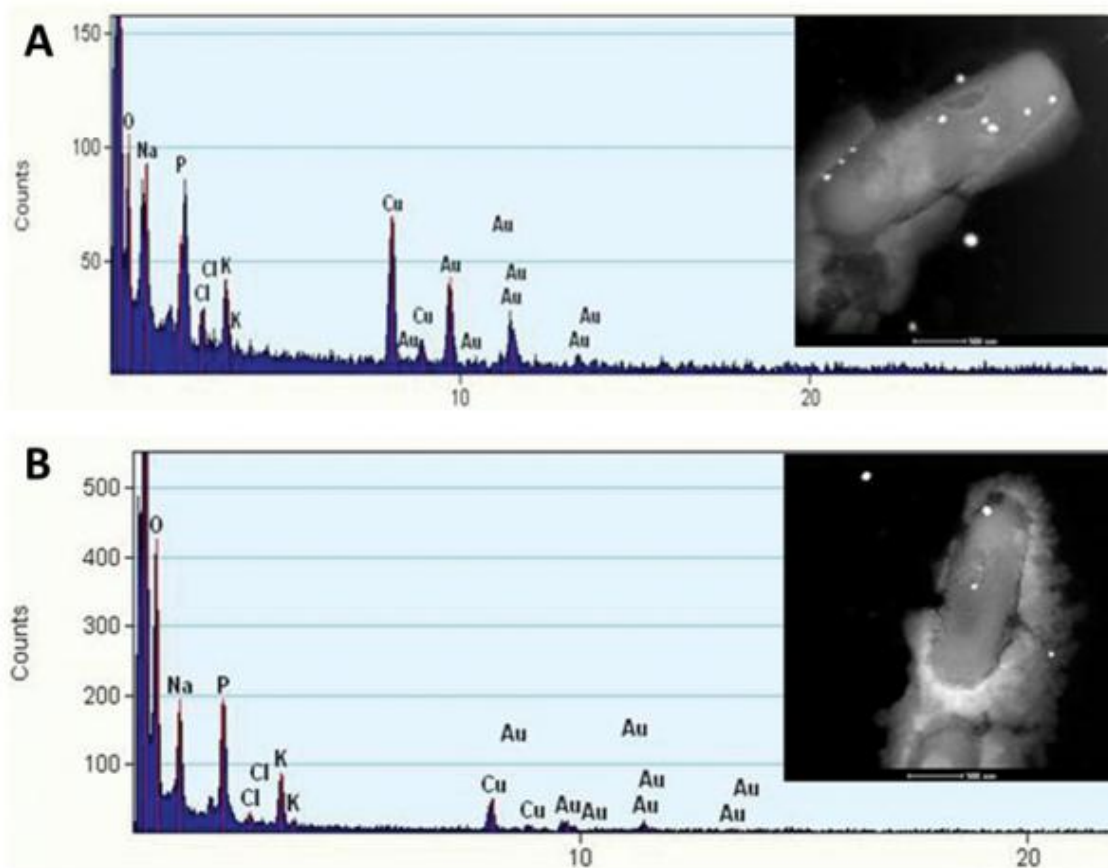

**Figure S3.** The gold nanoparticles formed when XL10-Gold cell harboring (A) pOW19F-PerpA3 and (B) pOW19F-PerpA4 were incubated with tyrosinase and gold solution ( $\text{HAuCl}_4$ ). The TEM-EDS analysis confirmed the formation of gold nanoparticles.

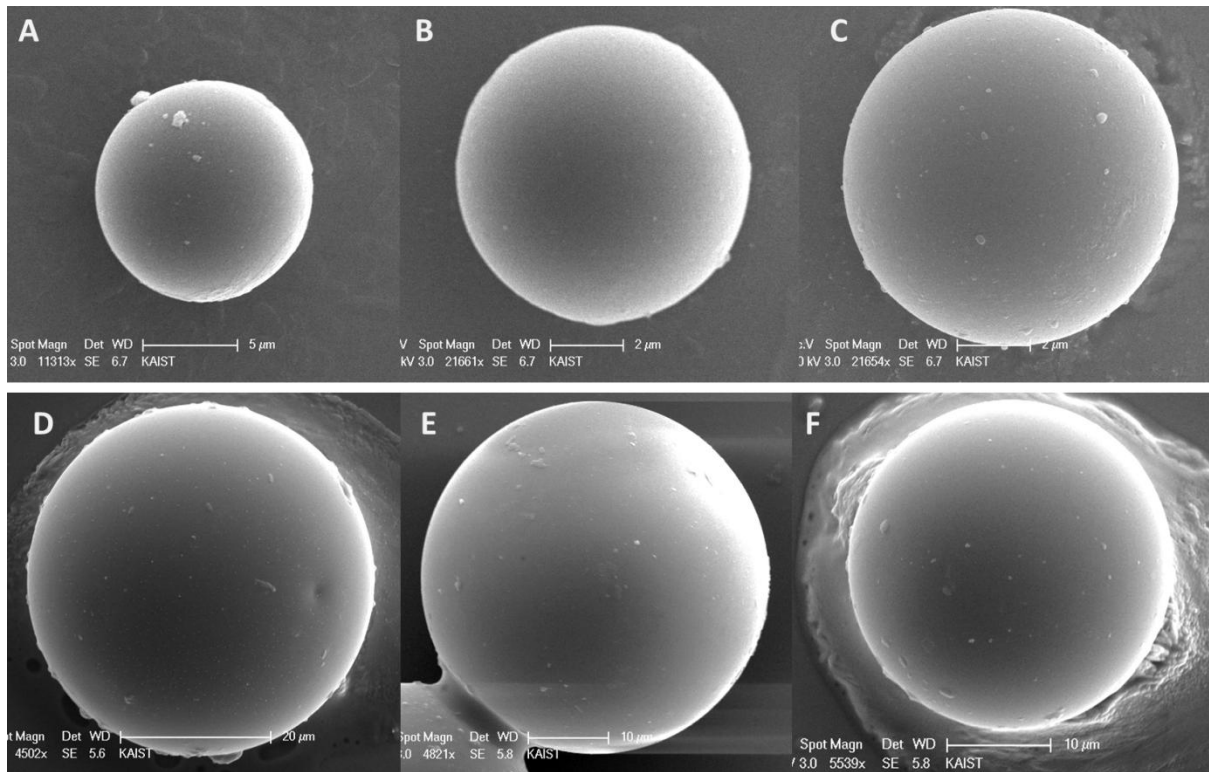

**Figure S4. Cell adhesion test** Cell adhesion test was performed on (A,B,C) silica microparticles and (D,E,F) glass microparticles. SEM analysis was employed to observe the surface of the microparticles. Control (A,D) *E. coli* XL10-Gold and recombinant *E. coli* harboring (B,E) pOW19F-PerPA1 and (C,F) pOW19F-PerPA2. All of the control cells were treated with tyrosinase.
